# Supplementary material for: Rapid and selective RRS determination of ferrocyanide with a nanogold surface molecularly imprinted polymethacrylic acid probe
Source: Royal Society of Chemistry journal article supplement (doi:10.1039/d4an00305e), 2024-01-01
Supplement: d4an00305e1.pdf [file d4an00305e1.pdf]

# Rapid and selective RRS determination of ferrocyanide with nanogold surface molecularly imprinted polymethacrylic acid probe

Yumei Li <sup>a,b,c</sup>, Yue Liu <sup>a,b,c</sup>, Aihui Liang <sup>a,b,c\*</sup>, Zhiliang Jiang <sup>a,b,c\*</sup>

<sup>a</sup> Key Laboratory of Ecology of Rare and Endangered Species and Environmental Protection (Guangxi Normal University), Ministry of Education, Guilin 541004, China; <sup>b</sup> Guangxi Key Laboratory of Environmental Pollution Control Theory and Technology, Guilin 541004, China; <sup>c</sup> Guangxi Key Laboratory of Environmental Processes and Remediation in Ecologically Fragile Regions.

A

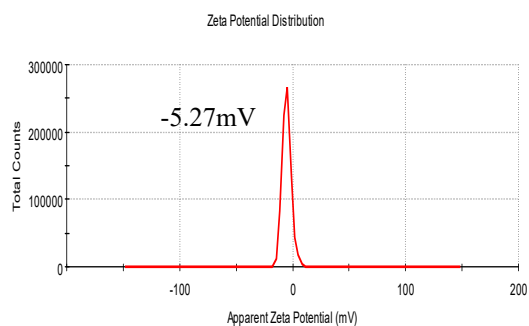

B

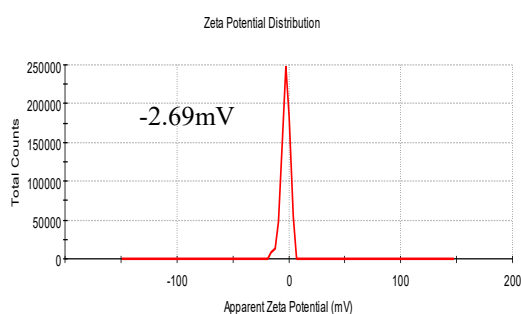

C

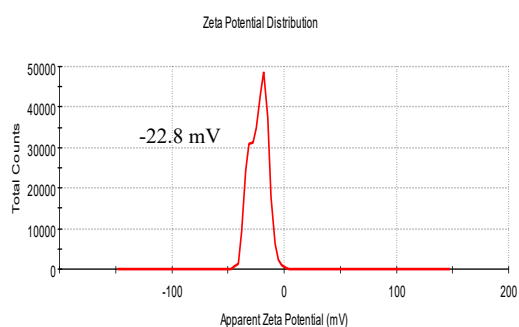

D

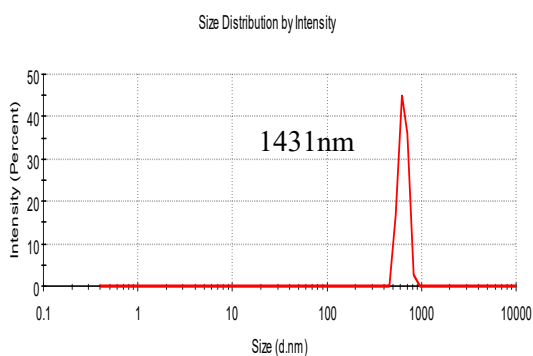

E

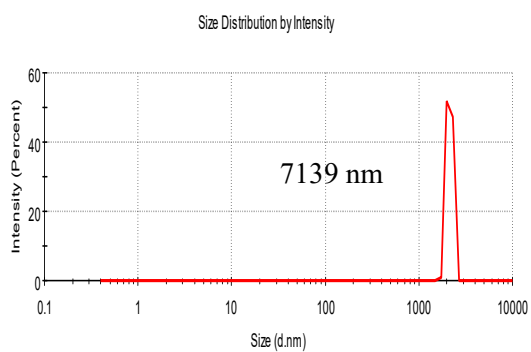

F

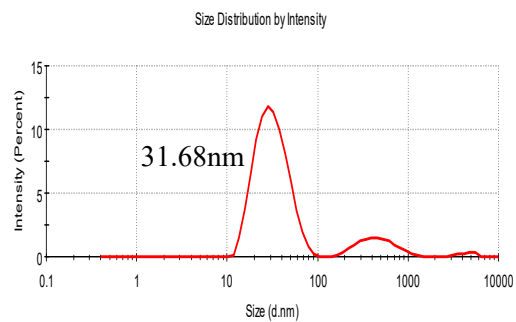

Fig. S1 Zeta potential and particle size distribution of AuNP@MIP, AuNP, and MIP

A: Zate potential diagram of 0.2 g/L AuNP@MIP; B: Zate potential diagram of 0.2 g/L MIP; C: Zate potential diagram of AuNP; D: Particle size diagram of 0.2 g/L AuNP@MIP; E: Particle size chart of 0.2 g/L MIP; F: Particle size chart of AuNP

A

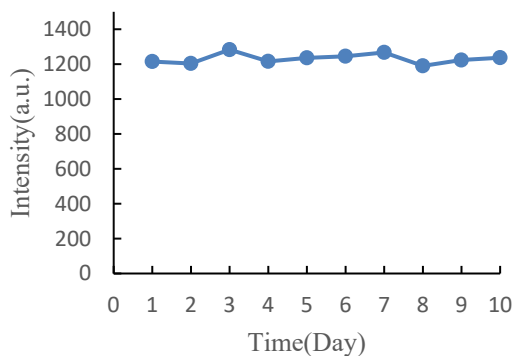

B

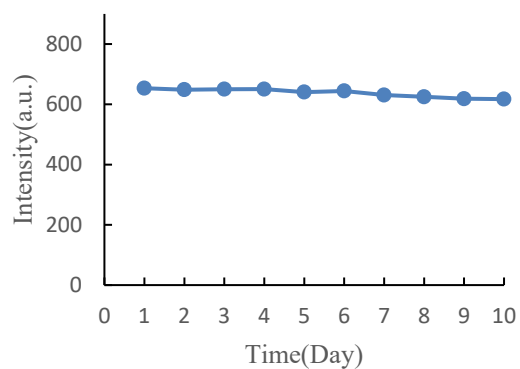

C

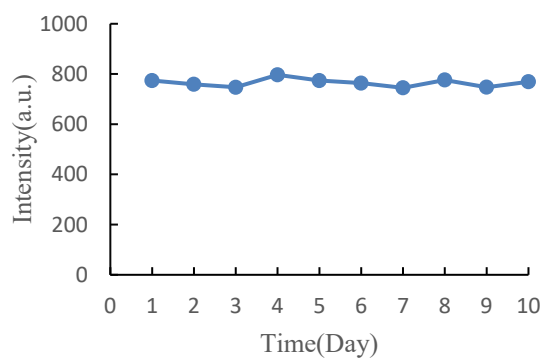

Fig. S2 Stability of AuNP@MIP, AuNP, and MIP over time

A: RRS signal variation of AuNP@MIP over time; B: RRS signal variation of AuNP over time; C: RRS signal variation of AuNP over time.

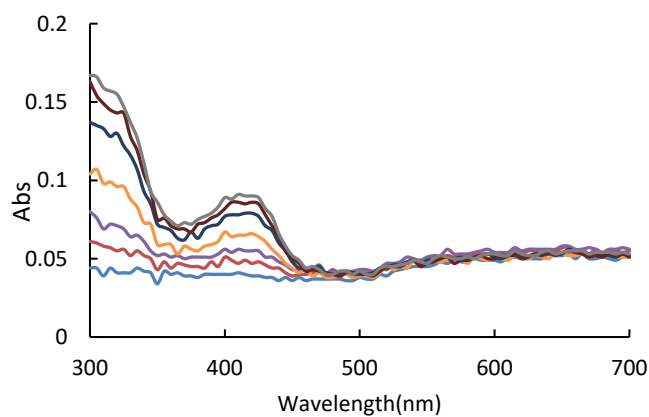

Fig. S3 Absorption spectrum of AuNP@MIP -  $K_4Fe(CN)_6$  - HCl system

AuNP<sub>10nm</sub>@MIP (0.04 g/L) + HCl (0.004 mol/L) +  $K_4Fe(CN)_6$  (0,25,50,125,175,200,250  $\mu$ mol/L).

A

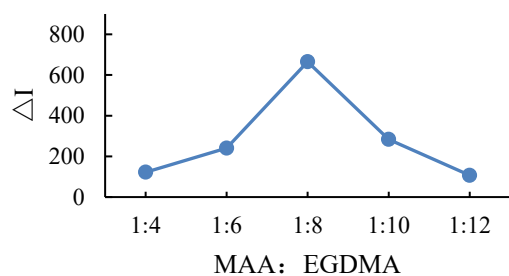

B

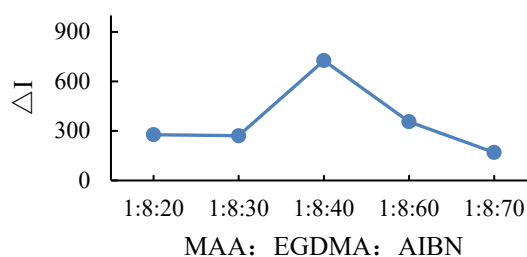

Fig. S4 Optimization of AuNP@MIP preparation conditions

A: Effect of functional monomer MAA:  $K_4Fe(CN)_6$  (0.25 mmol) + EGDMA (10 mmol) + 24.2 mg AIBN + 70 °C + 2 h + MAA (1, 1.5, 2, 2.5, 3 mmol); B: Effect of cross-linker EGDMA:  $K_4Fe(CN)_6$  (0.25 mmol) + MAA (2 mmol) + 24.2 mg AIBN + 70 °C + 2 h + EGDMA (5, 7.5, 10, 15, 17.5 mmol);

C

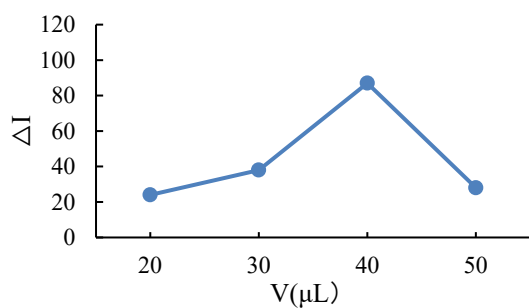

D

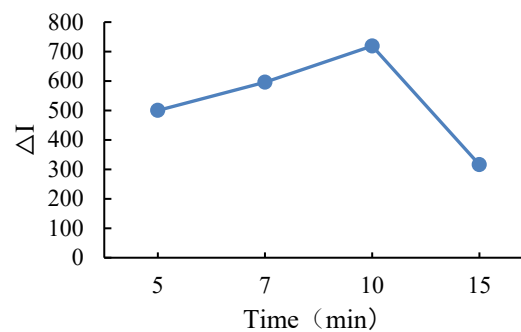

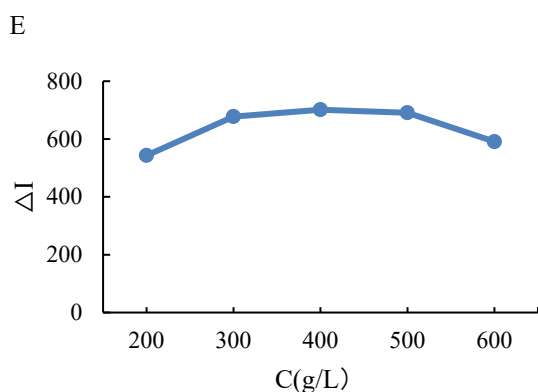

Fig. S5 the Optimization of AuNP @MIP-K<sub>4</sub>Fe(CN)<sub>6</sub>-HCl analysis system conditions

C: Effect of HCl concentration: AuNP<sub>10nm</sub>@MIP (0.04 g/L) + K<sub>4</sub>Fe(CN)<sub>6</sub> (10 μmol/L) + 0.2 mol/L HCl (20, 30, 40, 50 μL); D: Effect of reaction time: AuNP<sub>10nm</sub>@MIP (0.04 g/L) + K<sub>4</sub>Fe(CN)<sub>6</sub> (10 μmol/L) + HCl (0.004 mol/L) + reaction time (5 min, 7 min, 10 min, 15 min); E: Effect of AuNP@MIP concentration: K<sub>4</sub>Fe(CN)<sub>6</sub> (10 μmol/L) + HCl (0.004 mol/L) + 0.2 g/L AuNP<sub>10nm</sub>@MIP (200 μL, 300 μL, 400 μL, 500 μL, 600 μL)

Table. S1 Comparison of analytical methods for the determination of potassium ferricyanide

| Determination method | Principle                                                                                                                                                                                           | Linear range(μmol/L) | Comments                                                            | Ref.      |
|----------------------|-----------------------------------------------------------------------------------------------------------------------------------------------------------------------------------------------------|----------------------|---------------------------------------------------------------------|-----------|
| Fluorescent          | A novel fluorescent Si QDs probe for the rapid detection of potassium K <sub>4</sub> Fe(CN) <sub>6</sub> was introduced.                                                                            | 0.05~8 μg/mL         | Selective but complicated operation.                                | [18]      |
| RRS                  | A simple and rapid RRS method was developed for the detection of potassium K <sub>4</sub> Fe(CN) <sub>6</sub> in table salt.                                                                        | 0.03~5.7 μg/mL       | The detection method is sensitive and has a low linear range.       | [22]      |
| Electrochemistry     | A prototype of a current-limiting sensor was established to detect K <sub>4</sub> Fe(CN) <sub>6</sub> and improve the reaction efficiency through the high surface area of the porous Ni electrode. | 3~1000               | The detection method is novel, but the detection range is too high. | [23]      |
| Voltammetry          | Cyclic voltammetry was used to detect K <sub>4</sub> Fe(CN) <sub>6</sub> .                                                                                                                          | 1000~3000            | Good reproducibility and accuracy, but more reagent types required. | [24]      |
| Au@MIP RRS           | In this paper, the detection of K <sub>4</sub> Fe(CN) <sub>6</sub> by nanosurface molecularly imprinted                                                                                             | 0.02~0.4             | The detection method is simple, sensitive, fast, with low           | This work |

polymer spectral probes with selective recognition using RRS detection method is introduced.

detection linear range and low detection limit.

Table. S2 Effect of interfering ions on the RRS system

| interfering ions                   | Relative multiple | Relative error (%) | interfering ions                                                 | Relative multiple | Relative error (%) |
|------------------------------------|-------------------|--------------------|------------------------------------------------------------------|-------------------|--------------------|
| Ni <sup>2+</sup>                   | 1000              | -4.9%              | Ba <sup>2+</sup>                                                 | 1000              | +0.4%              |
| Co <sup>2+</sup>                   | 1000              | -1.2%              | Zn <sup>2+</sup>                                                 | 1000              | +6.7%              |
| Mn <sup>2+</sup>                   | 1000              | -8.2%              | K <sup>+</sup>                                                   | 1000              | -1.6%              |
| Mg <sup>2+</sup>                   | 1000              | +5.2%              | Al <sup>3+</sup>                                                 | 1000              | -5.6%              |
| Ca <sup>2+</sup>                   | 1000              | +0.1%              | Cd <sup>2+</sup>                                                 | 1000              | -2.4%              |
| PO <sub>4</sub> <sup>3-</sup>      | 1000              | +7.3%              | (NH <sub>4</sub> ) <sub>2</sub> MoO <sub>4</sub> O <sub>13</sub> | 1000              | -3.7%              |
| K <sub>3</sub> Fe(CN) <sub>6</sub> | 1000              | -1.9%              | KSCN                                                             | 1000              | +1.9%              |

Table. S3 Sample measurement results

| Sample | Average (μmol/L) | Added (μmol/L) | Detected (μmol/L) | Recovery (%) | RSD (%) | Content (mg/kg) |
|--------|------------------|----------------|-------------------|--------------|---------|-----------------|
| 1      | 0.3510           | 0.05           | 0.3964            | 90.8         | 2.38    | 2.96            |
| 2      | 0.3224           | 0.05           | 0.3680            | 91.2         | 2.41    | 2.72            |
| 3      | 0.2897           | 0.05           | 0.3360            | 92.6         | 1.50    | 2.44            |
| 4      | 0.3025           | 0.05           | 0.3483            | 91.6         | 3.02    | 2.55            |
| 5      | 0.2826           | 0.05           | 0.3297            | 94.2         | 2.17    | 2.38            |
| 6      | 0.2735           | 0.05           | 0.3194            | 91.8         | 1.08    | 2.30            |
